# Supplementary material for: Graphenylene-supported single-atom (Ru and Mo) catalysts for CO and NO oxidations
Source: Royal Society of Chemistry journal article supplement (doi:10.1039/d0nj03842c), 2020-01-01
Supplement: d0nj03842c1.pdf [file d0nj03842c1.pdf]

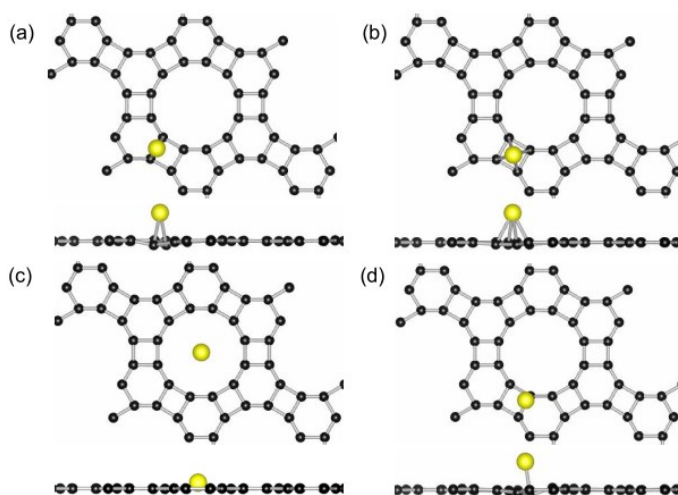

**Fig. S1.** Stable configurations for single Ru adatom is adsorbed at (a) B1, (b) H1, (c) H3 and (d) T sites.

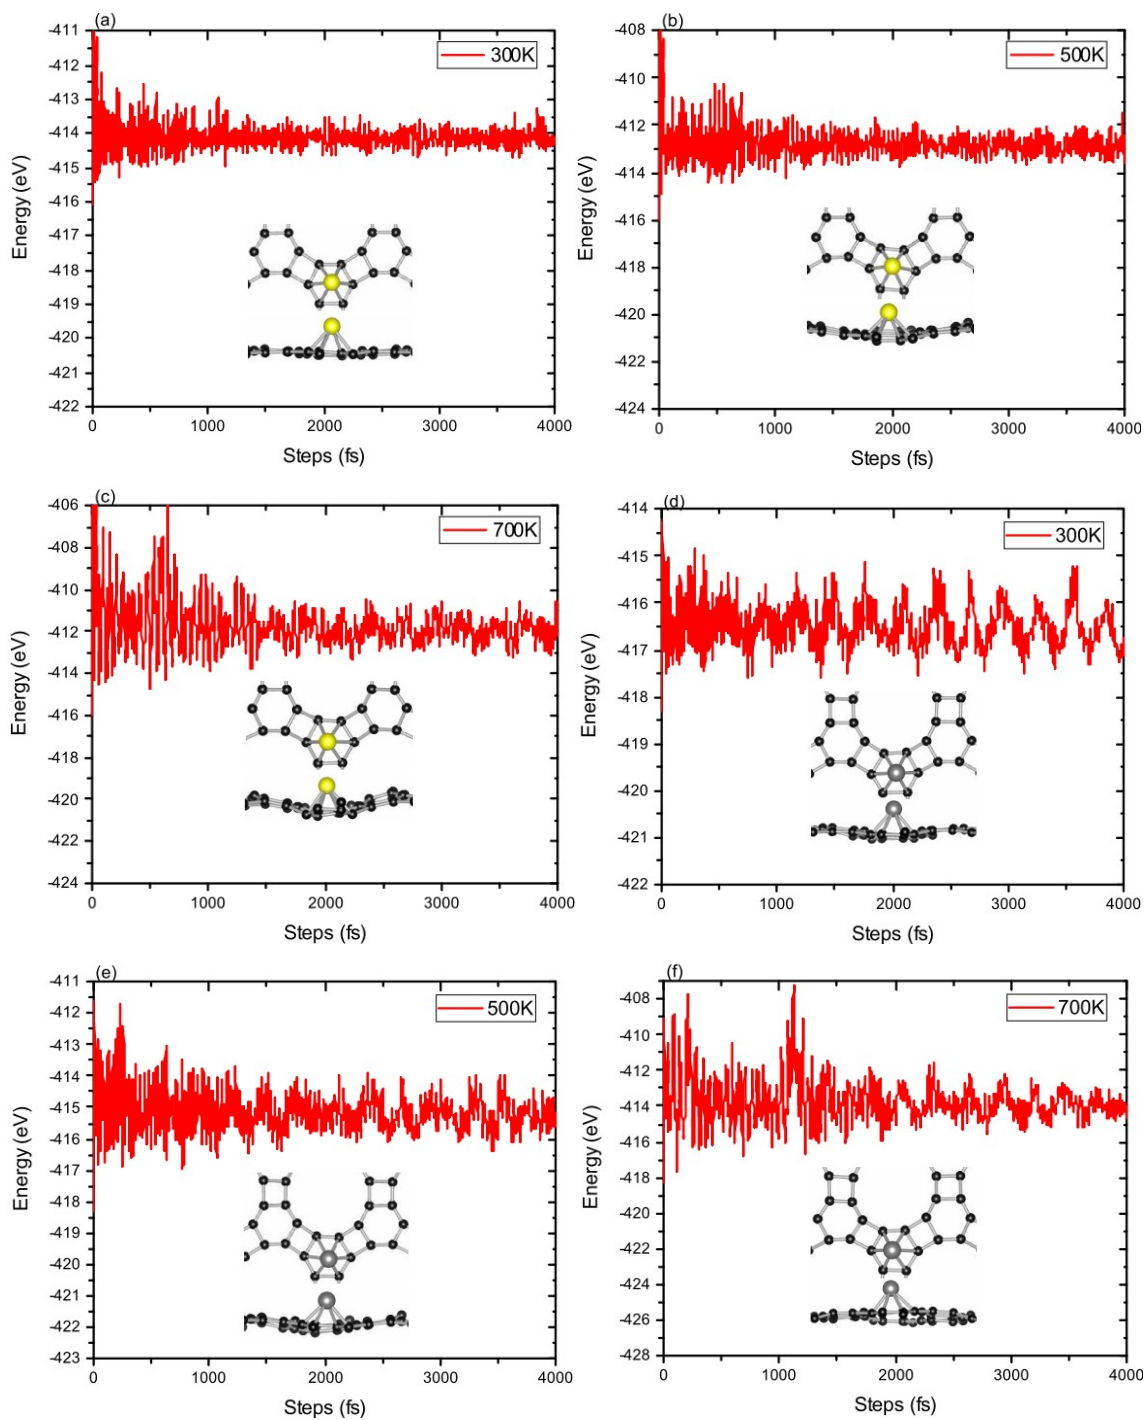

**Fig. S2** Top and side views of the stable configurations for (a)-(c) gra-Ru (d)-(f) gra-Mo from the molecular dynamics simulation at 300 K, 500 K and 700 K, respectively.
